# Supplementary material for: Shear stress switches the association of endothelial enhancers from ETV/ETS to KLF transcription factor binding sites
Source: Springer Nature journal article supplement (doi:10.1038/s41598-022-08645-8), 2022-03-21
Supplement: MOESM2 [file 41598_2022_8645_MOESM2_ESM.pdf › 41598_2022_8645_MOESM2_ESM.pdf]

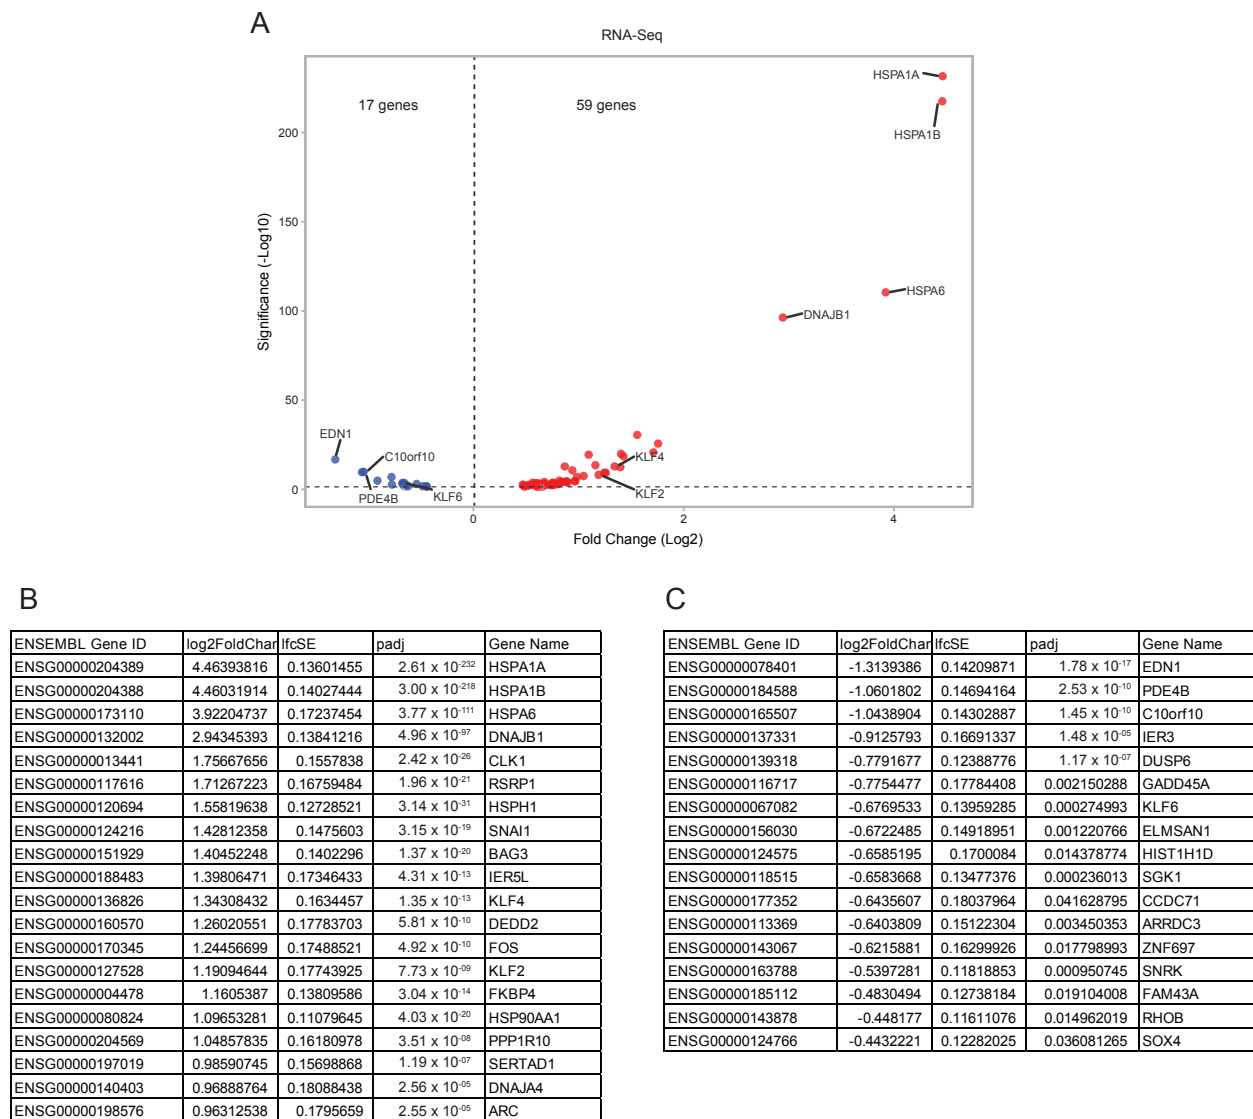

Tsaryk et al., Supplementary Fig. 1

A

| ENSEMBL Gene ID | log2FoldChar | lfcSE      | padj                   | Gene Name |
|-----------------|--------------|------------|------------------------|-----------|
| ENSG00000164530 | 7.23157246   | 0.5280092  | $1.17 \times 10^{-39}$ | PI16      |
| ENSG00000104783 | 6.32277206   | 0.57912565 | $5.64 \times 10^{-25}$ | KCNN4     |
| ENSG00000136999 | 5.85304792   | 0.41122402 | $9.33 \times 10^{-43}$ | NOV       |
| ENSG00000154734 | 5.75946696   | 0.36967531 | $4.36 \times 10^{-51}$ | ADAMTS1   |
| ENSG00000159871 | 5.70060654   | 0.52796033 | $1.93 \times 10^{-24}$ | LYPD5     |
| ENSG00000174600 | 5.59695605   | 0.3902341  | $2.59 \times 10^{-43}$ | CMKLR1    |
| ENSG00000165272 | 5.55498339   | 0.4965064  | $3.05 \times 10^{-26}$ | AQP3      |
| ENSG00000138061 | 5.35585517   | 0.37750583 | $1.59 \times 10^{-42}$ | CYP1B1    |
| ENSG00000095752 | 5.20564682   | 0.55119064 | $1.27 \times 10^{-18}$ | IL11      |
| ENSG00000127528 | 5.18998818   | 0.32922041 | $3.58 \times 10^{-52}$ | KLF2      |
| ENSG00000136826 | 5.18397413   | 0.31076796 | $2.35 \times 10^{-58}$ | KLF4      |
| ENSG00000138623 | 5.10866282   | 0.36068163 | $2.01 \times 10^{-42}$ | SEMA7A    |
| ENSG00000115461 | 4.81144856   | 0.57753478 | $1.69 \times 10^{-14}$ | IGFBP5    |
| ENSG00000138670 | 4.66333256   | 0.45288322 | $3.40 \times 10^{-22}$ | RASGEF1B  |
| ENSG00000156427 | 4.59630516   | 0.61176361 | $9.00 \times 10^{-12}$ | FGF18     |
| ENSG00000163273 | 4.54553639   | 0.6422798  | $1.97 \times 10^{-10}$ | NPPC      |
| ENSG00000159167 | 4.51412326   | 0.64154326 | $2.56 \times 10^{-10}$ | STC1      |
| ENSG00000103196 | 4.44455529   | 0.50811566 | $5.73 \times 10^{-16}$ | CRISPLD2  |
| ENSG00000158955 | 4.35011621   | 0.57866494 | $8.81 \times 10^{-12}$ | WNT9B     |
| ENSG00000136153 | 4.20294978   | 0.30668654 | $1.14 \times 10^{-39}$ | LMO7      |

B

| ENSEMBL Gene ID | log2FoldChar | lfcSE      | padj                   | Gene Name |
|-----------------|--------------|------------|------------------------|-----------|
| ENSG00000120738 | -4.4450289   | 0.50319511 | $2.71 \times 10^{-16}$ | EGR1      |
| ENSG00000131386 | -4.295856    | 0.44044927 | $6.88 \times 10^{-23}$ | GALNT15   |
| ENSG00000157404 | -4.1179487   | 0.36338554 | $6.98 \times 10^{-27}$ | KIT       |
| ENSG00000165507 | -4.0506711   | 0.34476833 | $6.69 \times 10^{-29}$ | C10orf10  |
| ENSG00000091879 | -3.8945261   | 0.33828627 | $9.34 \times 10^{-28}$ | ANGPT2    |
| ENSG00000185950 | -3.5480676   | 0.58826512 | $1.22 \times 10^{-27}$ | IRS2      |
| ENSG00000121966 | -3.4732088   | 0.64951835 | $4.69 \times 10^{-26}$ | CXCR4     |
| ENSG00000088756 | -3.4616065   | 0.32997433 | $4.63 \times 10^{-23}$ | ARHGAP28  |
| ENSG00000185477 | -3.3086477   | 0.63290089 | $8.26 \times 10^{-26}$ | GPRIN3    |
| ENSG00000196421 | -3.1331681   | 0.52521289 | $1.72 \times 10^{-27}$ | LINC00176 |
| ENSG00000175746 | -3.0777502   | 0.39842478 | $1.91 \times 10^{-12}$ | C15orf54  |
| ENSG00000118407 | -3.0379694   | 0.64954491 | 0.000106491            | FILIP1    |
| ENSG00000171408 | -3.0088392   | 0.36997637 | $8.22 \times 10^{-14}$ | PDE7B     |
| ENSG00000198355 | -2.9427072   | 0.31875833 | $7.75 \times 10^{-16}$ | PIM3      |
| ENSG00000005187 | -2.9318501   | 0.36192126 | $1.05 \times 10^{-13}$ | ACSM3     |
| ENSG00000128594 | -2.8804755   | 0.55544442 | $1.02 \times 10^{-25}$ | LRRC4     |
| ENSG00000137266 | -2.8721365   | 0.38840704 | $2.11 \times 10^{-11}$ | SLC22A23  |
| ENSG00000151967 | -2.8712331   | 0.44830357 | $1.38 \times 10^{-26}$ | SCHIP1    |
| ENSG00000004799 | -2.8600017   | 0.45302171 | $2.42 \times 10^{-28}$ | PDK4      |
| ENSG00000152207 | -2.8474613   | 0.70002554 | 0.001222303            | CYSLTR2   |

C

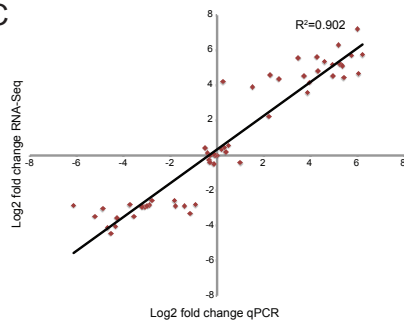

E

| Genes         | Our data | Maleszewska et al |         | Maimari et al |         | Dekker et al |         |
|---------------|----------|-------------------|---------|---------------|---------|--------------|---------|
|               | DE genes | DE genes          | Overlap | DE genes      | Overlap | DE genes     | Overlap |
| Upregulated   | 647      | 615               | 233     | 1003          | 249     | 600          | 111     |
| Downregulated | 367      | 835               | 104     | 635           | 71      | 439          | 44      |
| Total         | 1014     | 1450              | 350     | 1638          | 330     | 1039         | 163     |
| %             |          |                   | 34.5%   |               | 32.5%   |              | 15.7%   |

D

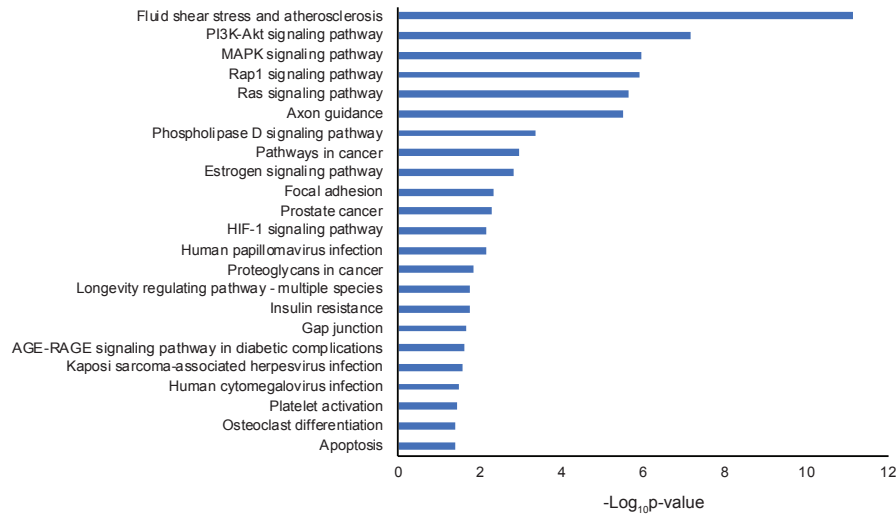

Tsaryk et al., Supplementary Fig. 2

A

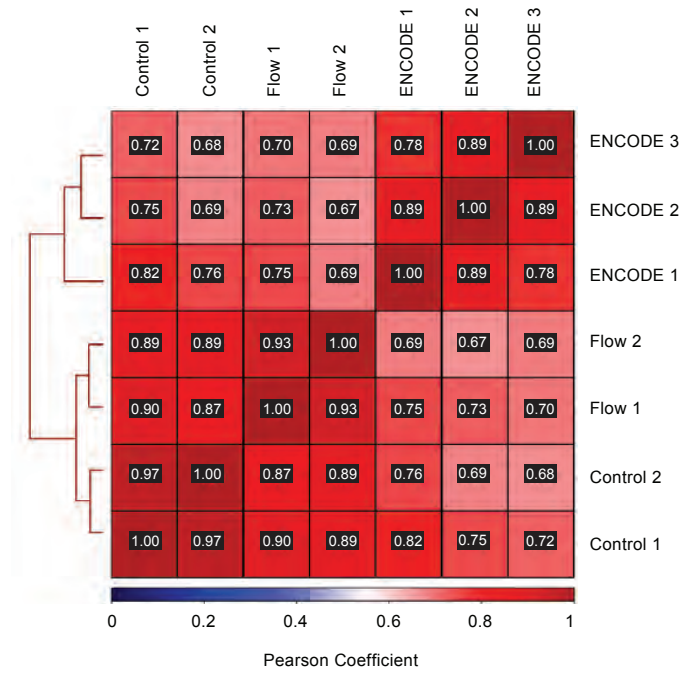

B

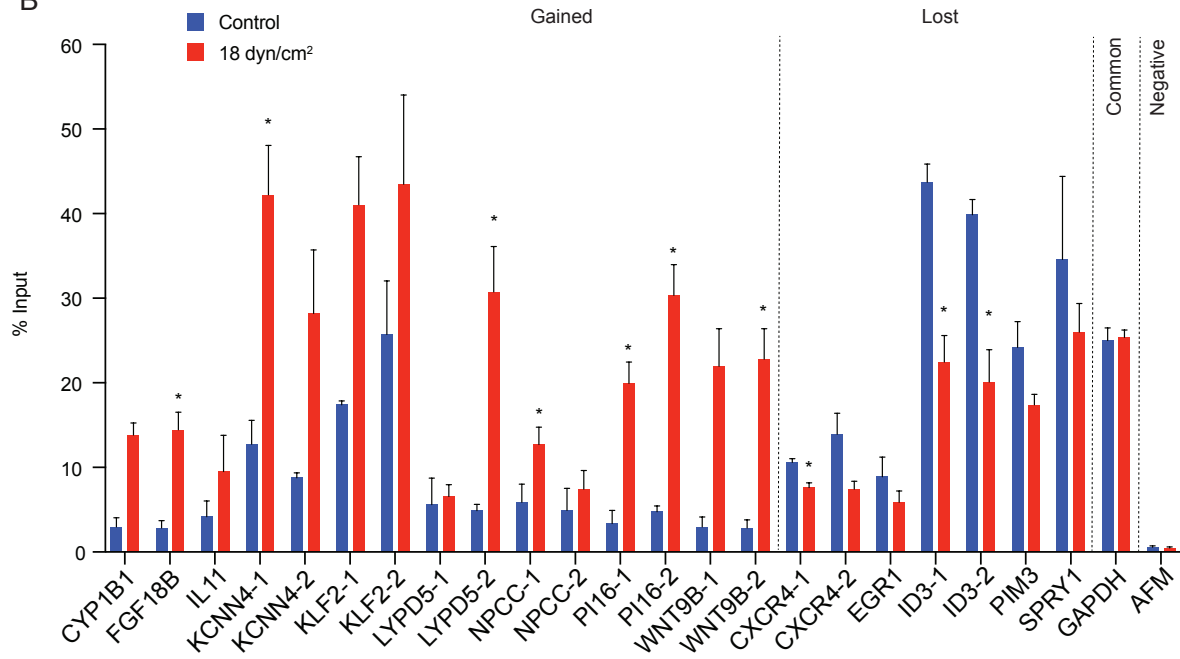

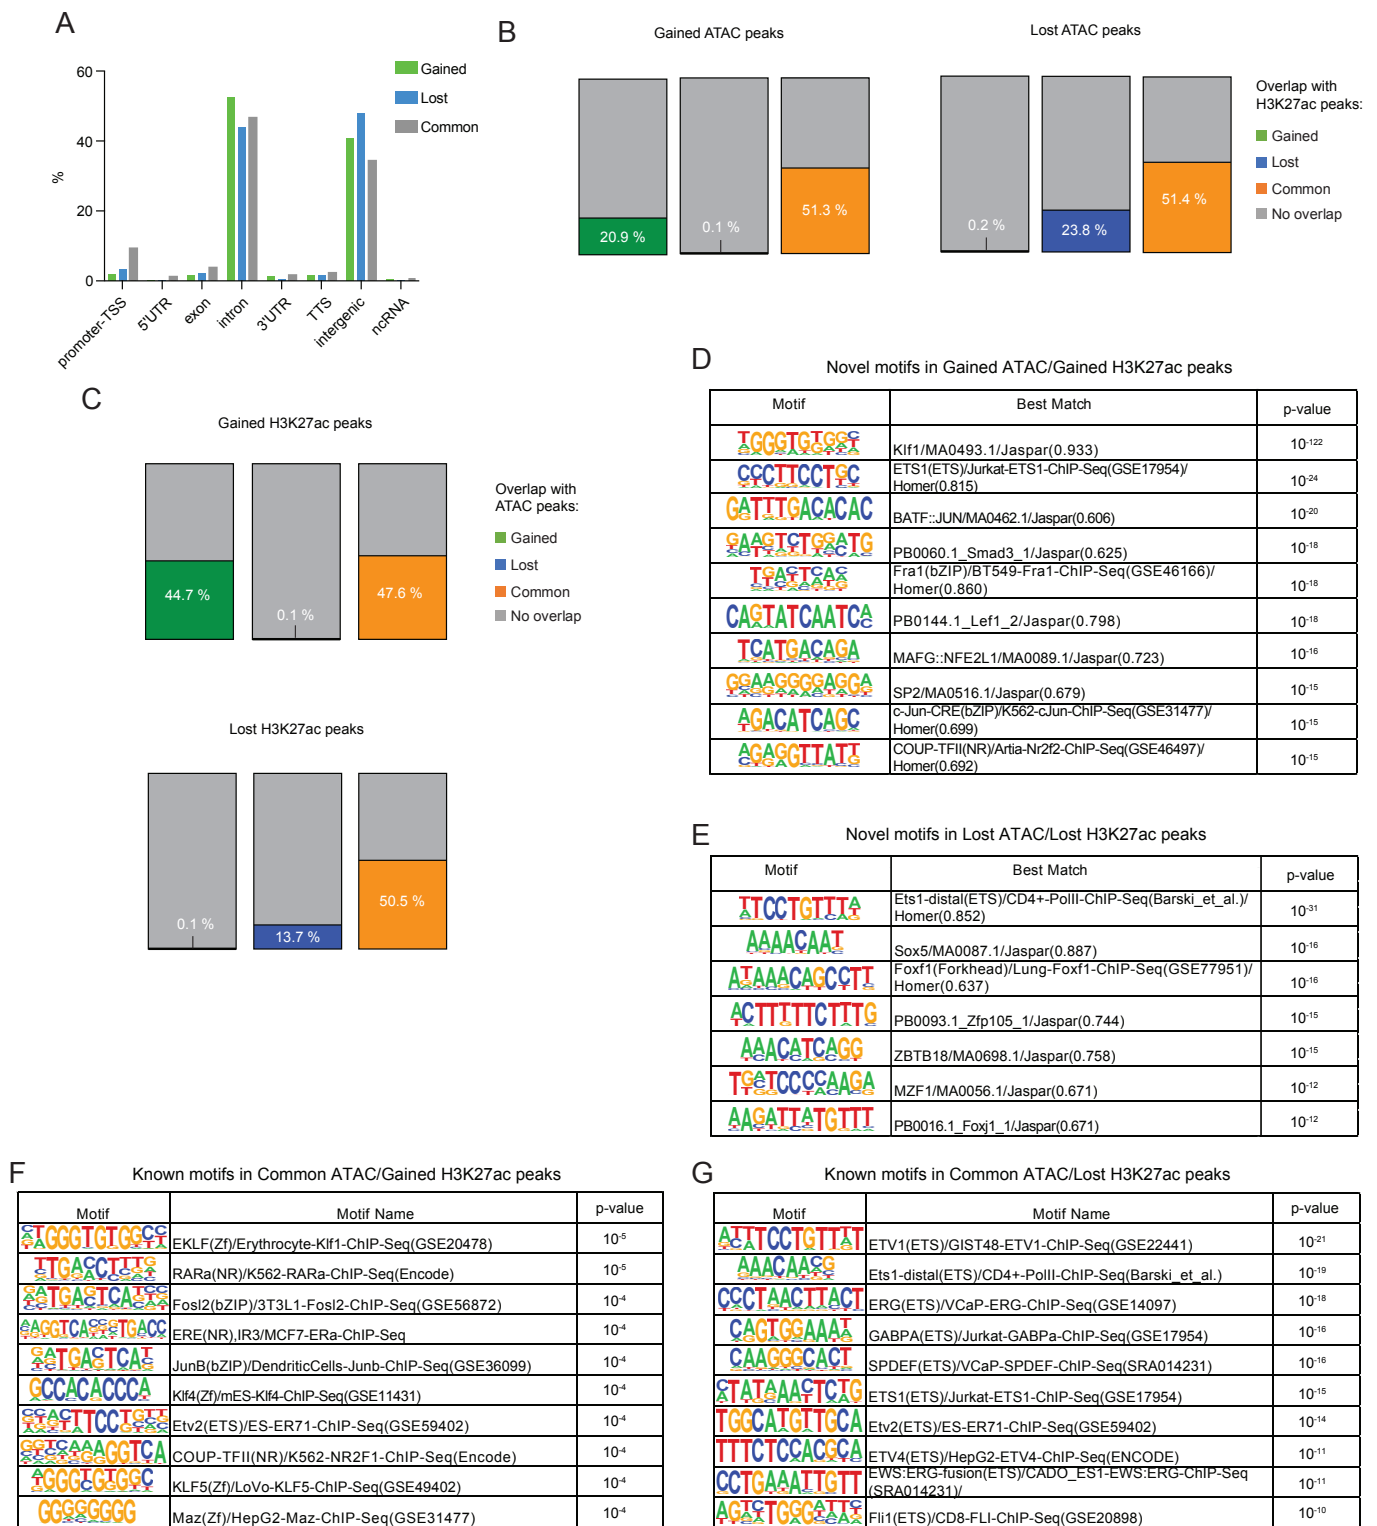

Tsaryk et al., Supplementary Fig. 4

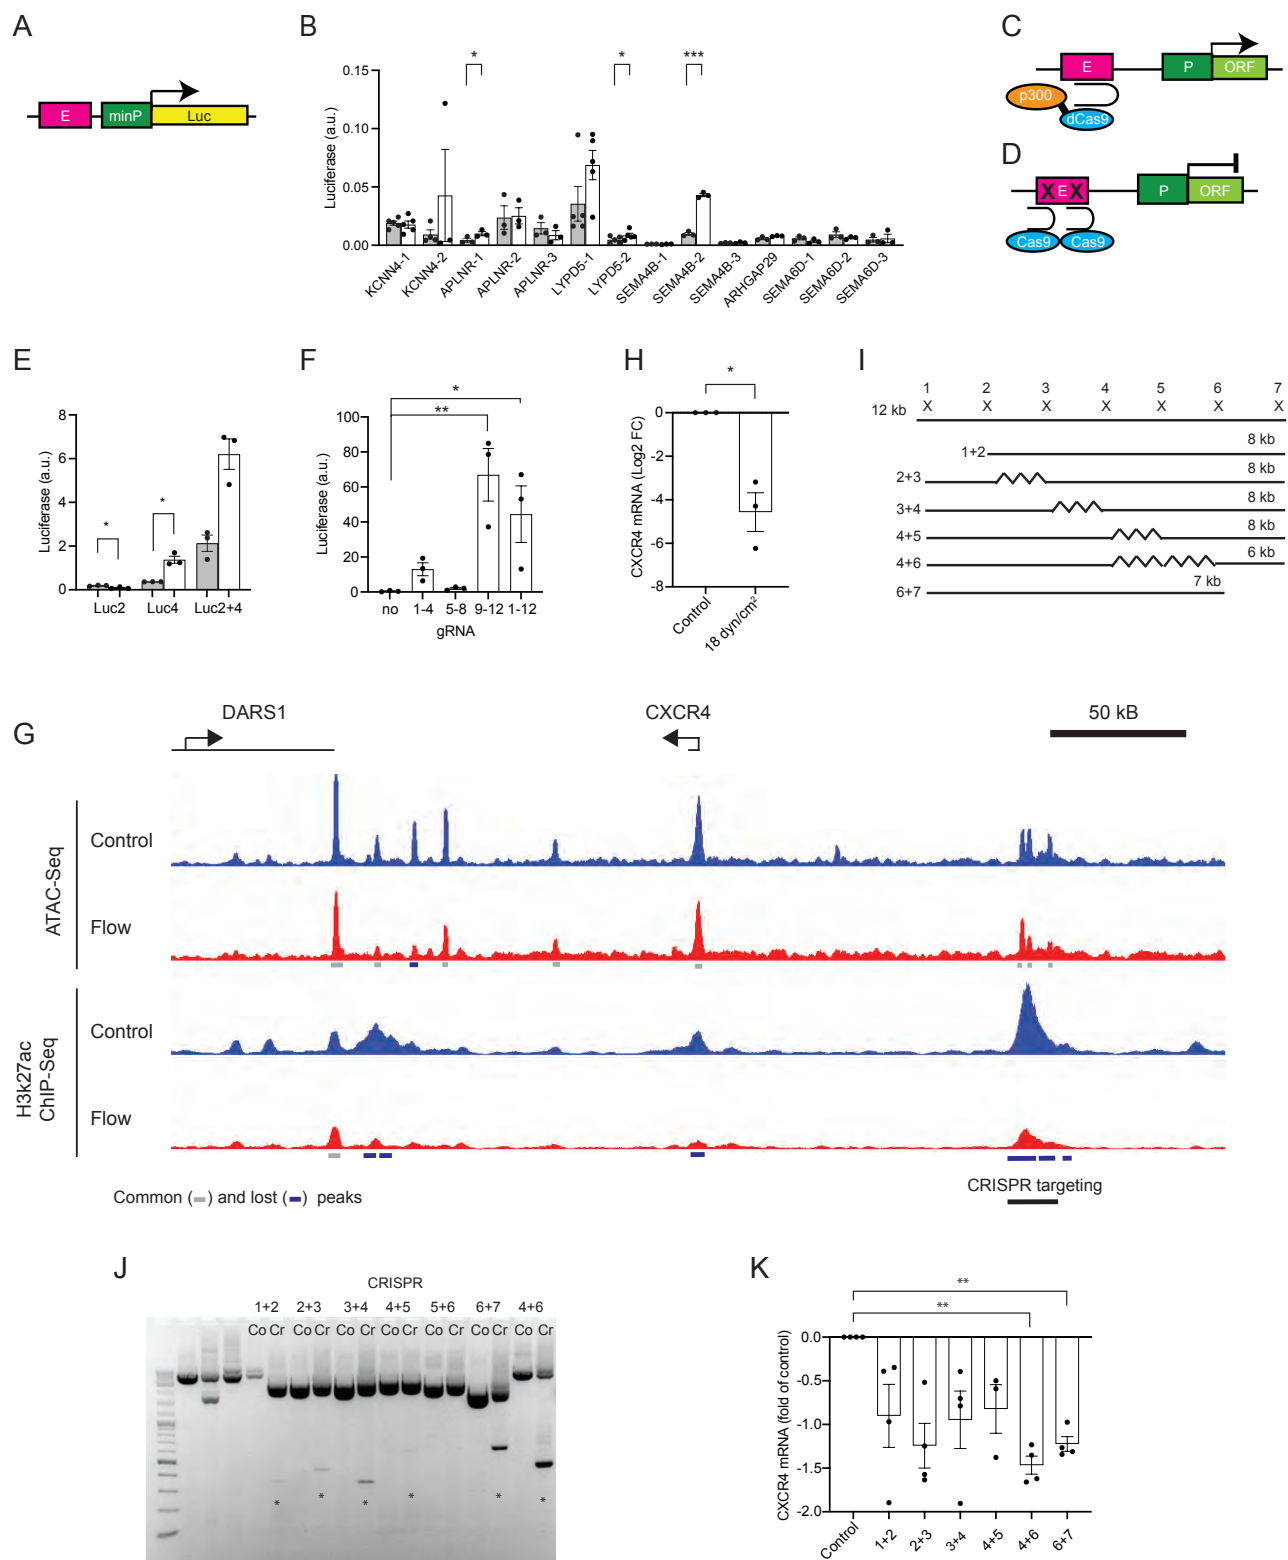

Tsaryk et al., Supplementary Fig. 5

A

| ENSEMBL Gene ID    | log2FoldChar | lfcSE      | padj                     | gene_name        |
|--------------------|--------------|------------|--------------------------|------------------|
| ENSDARG00000052646 | 3.42153839   | 0.35031736 | 1.03 x 10 <sup>-19</sup> | frf69            |
| ENSDARG00000039943 | 3.06727405   | 0.24633644 | 1.27 x 10 <sup>-31</sup> | fam46ba          |
| ENSDARG00000098155 | 2.95610381   | 0.28914694 | 1.44 x 10 <sup>-21</sup> | si:dkeyp-3b12.11 |
| ENSDARG00000019874 | 2.56354094   | 0.31665277 | 1.61 x 10 <sup>-13</sup> | hsph1            |
| ENSDARG00000037099 | 2.53560502   | 0.26666363 | 1.19 x 10 <sup>-18</sup> | irs2a            |
| ENSDARG00000038489 | 2.49300998   | 0.22164013 | 5.47 x 10 <sup>-26</sup> | b3gnt7           |
| ENSDARG00000075833 | 2.44780036   | 0.23852428 | 1.07 x 10 <sup>-21</sup> | lyve1a           |
| ENSDARG00000041022 | 2.39342709   | 0.24258267 | 4.48 x 10 <sup>-20</sup> | pdc4b            |
| ENSDARG00000060113 | 2.38844383   | 0.21944098 | 2.11 x 10 <sup>-24</sup> | znf395a          |
| ENSDARG00000098925 | 2.29118385   | 0.30319    | 9.07 x 10 <sup>-12</sup> | prdm1b           |
| ENSDARG00000096518 | 2.23143627   | 0.35066543 | 2.20 x 10 <sup>-8</sup>  | si:ch73-95a24.1  |
| ENSDARG00000069282 | 2.18169268   | 0.3028213  | 1.12 x 10 <sup>-10</sup> | bcb3             |
| ENSDARG00000099002 | 2.14552934   | 0.31031123 | 7.16 x 10 <sup>-10</sup> | creb5a           |
| ENSDARG00000101135 | 2.13959387   | 0.31773682 | 2.18 x 10 <sup>-9</sup>  | si:dkey-85k7.7   |
| ENSDARG00000027529 | 2.13089445   | 0.24266781 | 6.23 x 10 <sup>-16</sup> | hmox1a           |
| ENSDARG00000024746 | 2.1286108    | 0.39057968 | 3.26 x 10 <sup>-6</sup>  | hsp90aa1.2       |
| ENSDARG00000036848 | 2.0836956    | 0.17989377 | 1.55 x 10 <sup>-27</sup> | slc43a2a         |
| ENSDARG00000023217 | 2.02945464   | 0.19637621 | 5.68 x 10 <sup>-22</sup> | crema            |
| ENSDARG00000020761 | 2.01762514   | 0.22426926 | 1.03 x 10 <sup>-16</sup> | aridc2           |
| ENSDARG00000094557 | 2.01254617   | 0.32863327 | 9.16 x 10 <sup>-08</sup> | nupr1            |

B

1.61 x 10<sup>-13</sup>

| ENSEMBL Gene ID    | log2FoldChar | lfcSE      | padj                     | gene_name        |
|--------------------|--------------|------------|--------------------------|------------------|
| ENSDARG00000053204 | -1.9815825   | 0.28403354 | 4.82 x 10 <sup>-10</sup> | snx22            |
| ENSDARG00000061923 | -1.9630544   | 0.16346249 | 1.47 x 10 <sup>-29</sup> | amotl2a          |
| ENSDARG00000040764 | -1.829106    | 0.19509112 | 3.97 x 10 <sup>-18</sup> | id1              |
| ENSDARG00000078800 | -1.6770781   | 0.3338926  | 2.50 x 10 <sup>-5</sup>  | slc26a10         |
| ENSDARG00000037555 | -1.6720874   | 0.3033587  | 2.41 x 10 <sup>-6</sup>  | atoh8            |
| ENSDARG00000042934 | -1.659224    | 0.23592535 | 3.34 x 10 <sup>-10</sup> | ctgfa            |
| ENSDARG00000018441 | -1.5575572   | 0.1724045  | 7.62 x 10 <sup>-17</sup> | heg1             |
| ENSDARG00000024204 | -1.523809    | 0.22797693 | 2.98 x 10 <sup>-5</sup>  | mcm3             |
| ENSDARG00000045748 | -1.4951781   | 0.18453174 | 1.60 x 10 <sup>-13</sup> | stab2            |
| ENSDARG00000061948 | -1.4915171   | 0.24854555 | 1.85 x 10 <sup>-7</sup>  | amotl2b          |
| ENSDARG00000031894 | -1.4695724   | 0.23481427 | 4.08 x 10 <sup>-4</sup>  | lef1             |
| ENSDARG00000099395 | -1.4649494   | 0.33276355 | 3.35 x 10 <sup>-4</sup>  | cables1          |
| ENSDARG00000101707 | -1.4281017   | 0.34863545 | 1.06 x 10 <sup>-3</sup>  | si:ch211-156b7.4 |
| ENSDARG00000030104 | -1.4200317   | 0.25455302 | 1.76 x 10 <sup>-6</sup>  | sh3bp4           |
| ENSDARG00000035694 | -1.4188867   | 0.32617363 | 4.05 x 10 <sup>-4</sup>  | stm              |
| ENSDARG00000038785 | -1.417025    | 0.19775843 | 1.46 x 10 <sup>-10</sup> | abcf2a           |
| ENSDARG0000002216  | -1.3707023   | 0.2790729  | 4.09 x 10 <sup>-5</sup>  | tbx3a            |
| ENSDARG00000090337 | -1.3600781   | 0.22591338 | 1.66 x 10 <sup>-7</sup>  | pprc1            |
| ENSDARG00000012506 | -1.3427077   | 0.29865342 | 2.36 x 10 <sup>-4</sup>  | mrpep            |
| ENSDARG00000038703 | -1.3397517   | 0.31008385 | 4.53 x 10 <sup>-4</sup>  | hkdc1            |

C

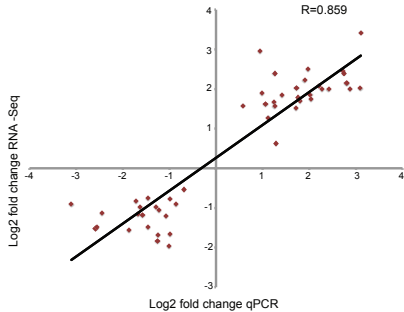

D

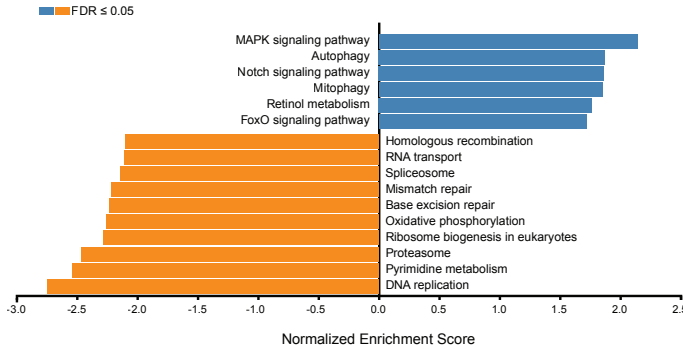

E

| H. sapiens |              | D. rerio |              | Overlap      |      |
|------------|--------------|----------|--------------|--------------|------|
| DE genes   | Nr. of genes | DE genes | Nr. of genes | Nr. of genes | %    |
| UP         | 647          | DOWN     | 483          | 30           | 6.2  |
| DOWN       | 367          | UP       | 584          | 47           | 8.0  |
| ALL        | 1014         | ALL      | 1067         | 146          | 13.7 |

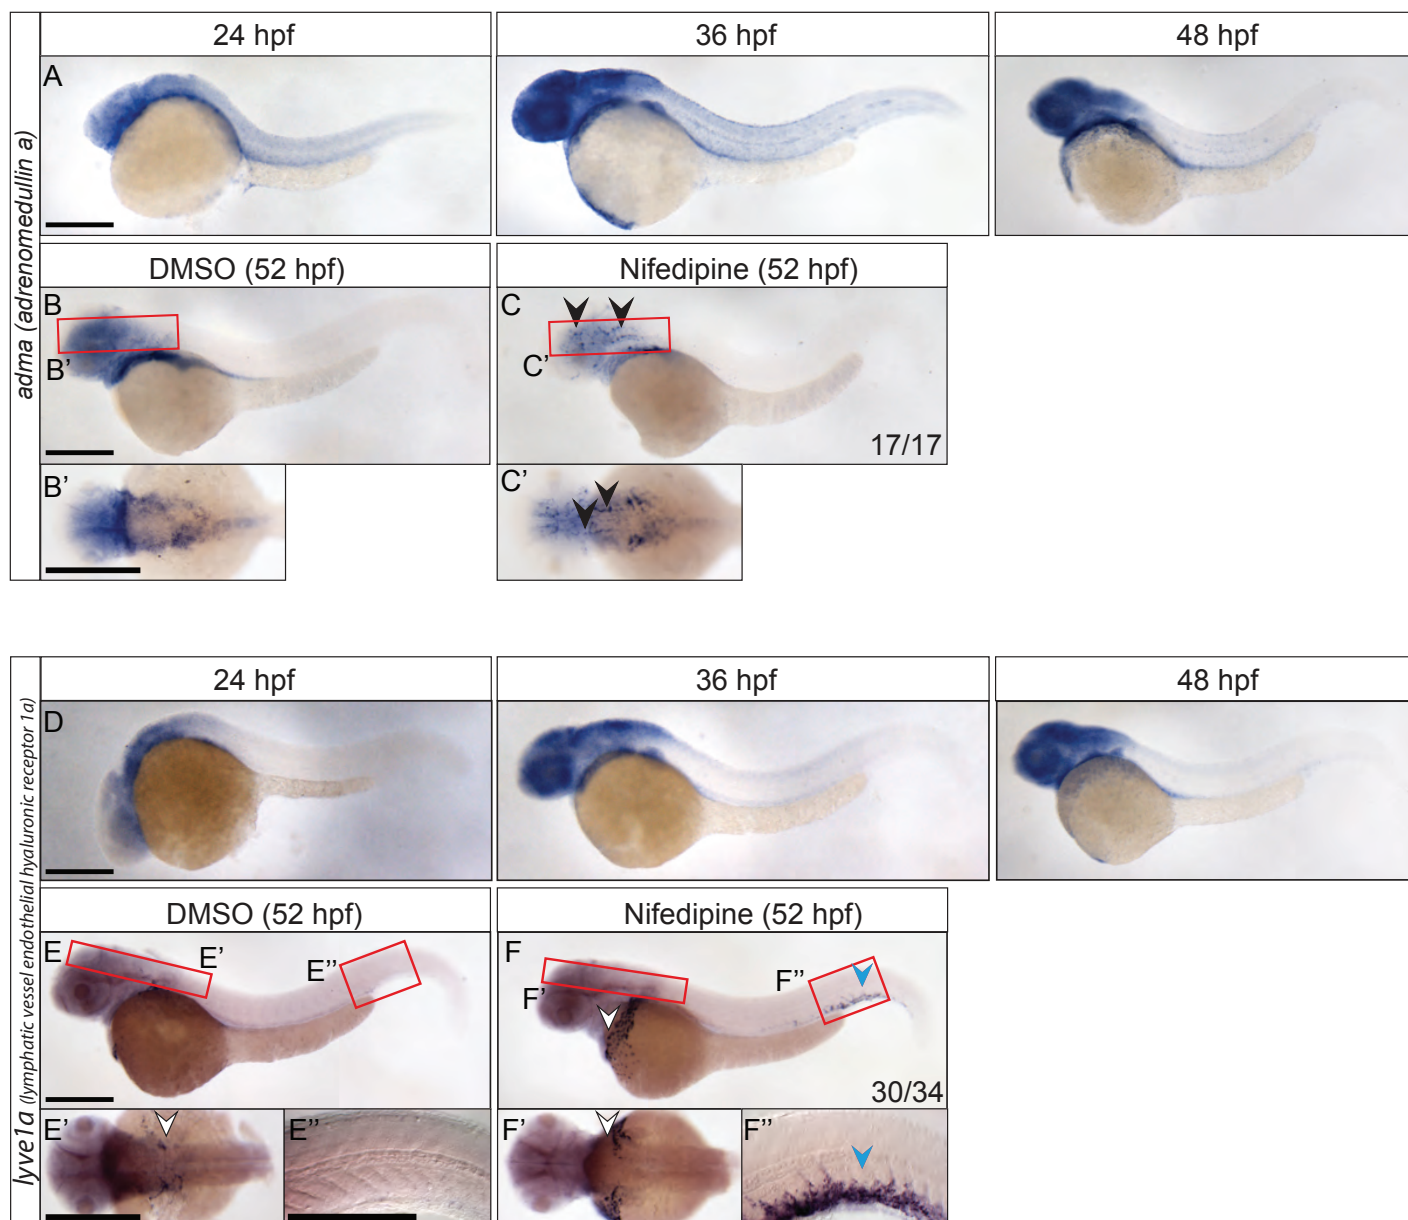

Tsaryk et al., Supplementary Fig. 7



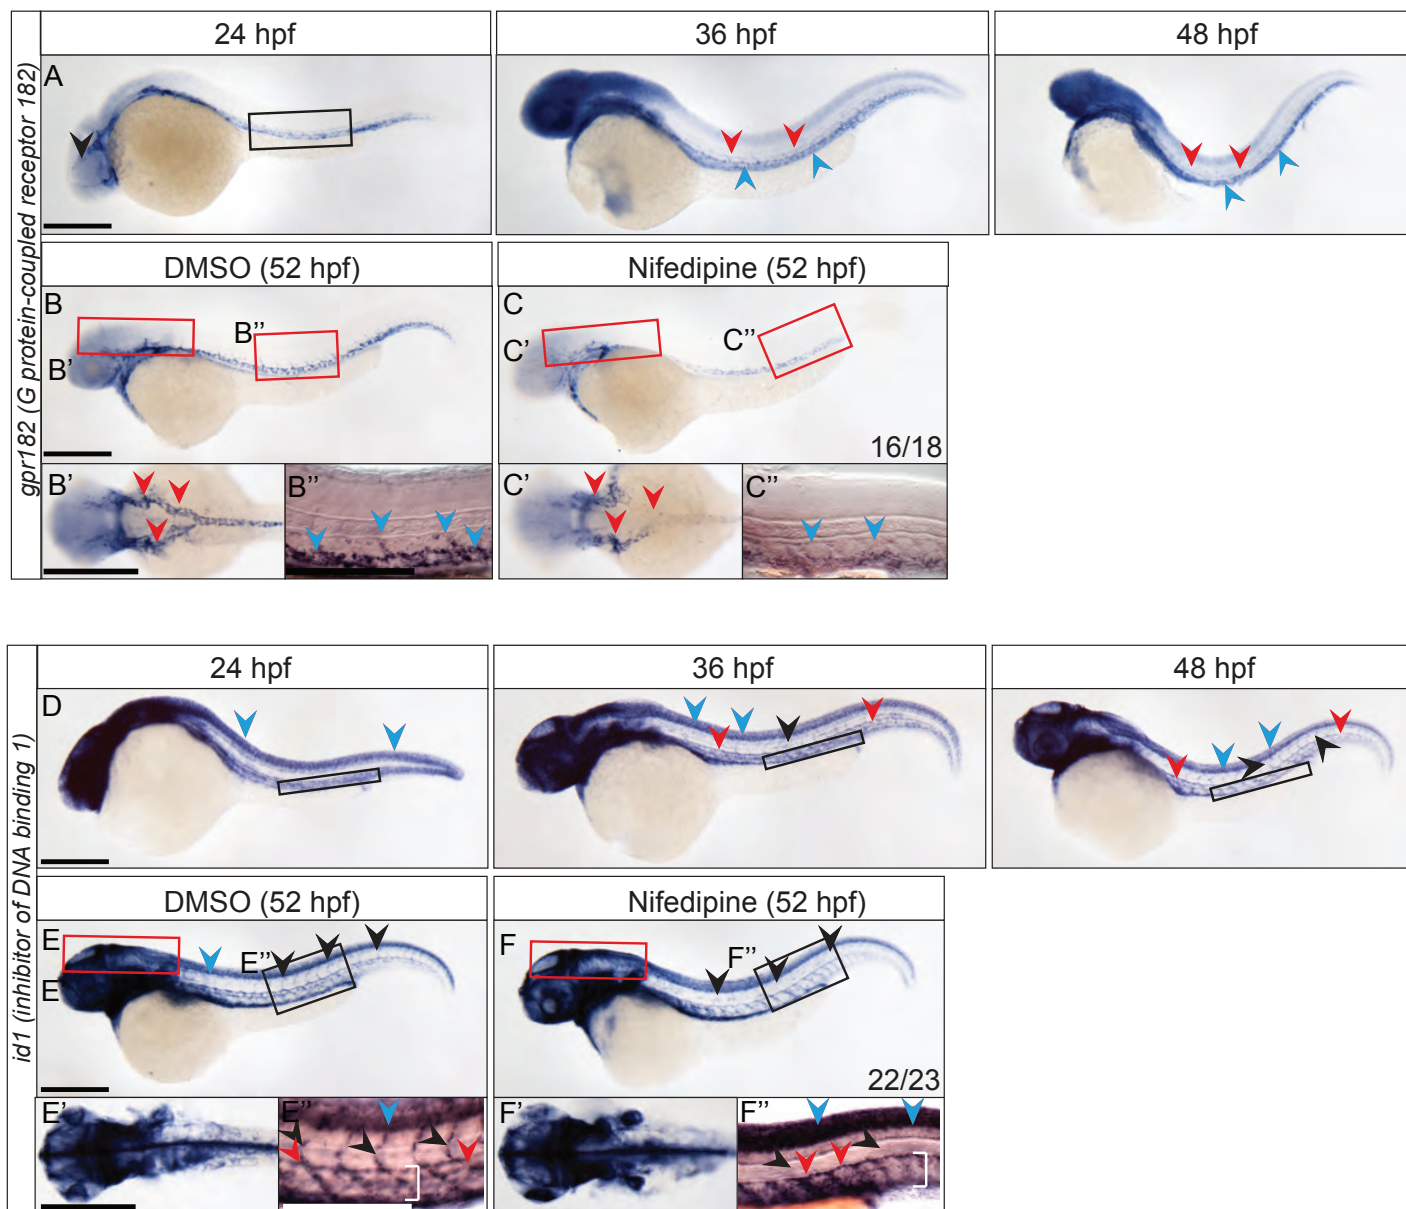

Tsaryk et al., Supplementary Fig. 8



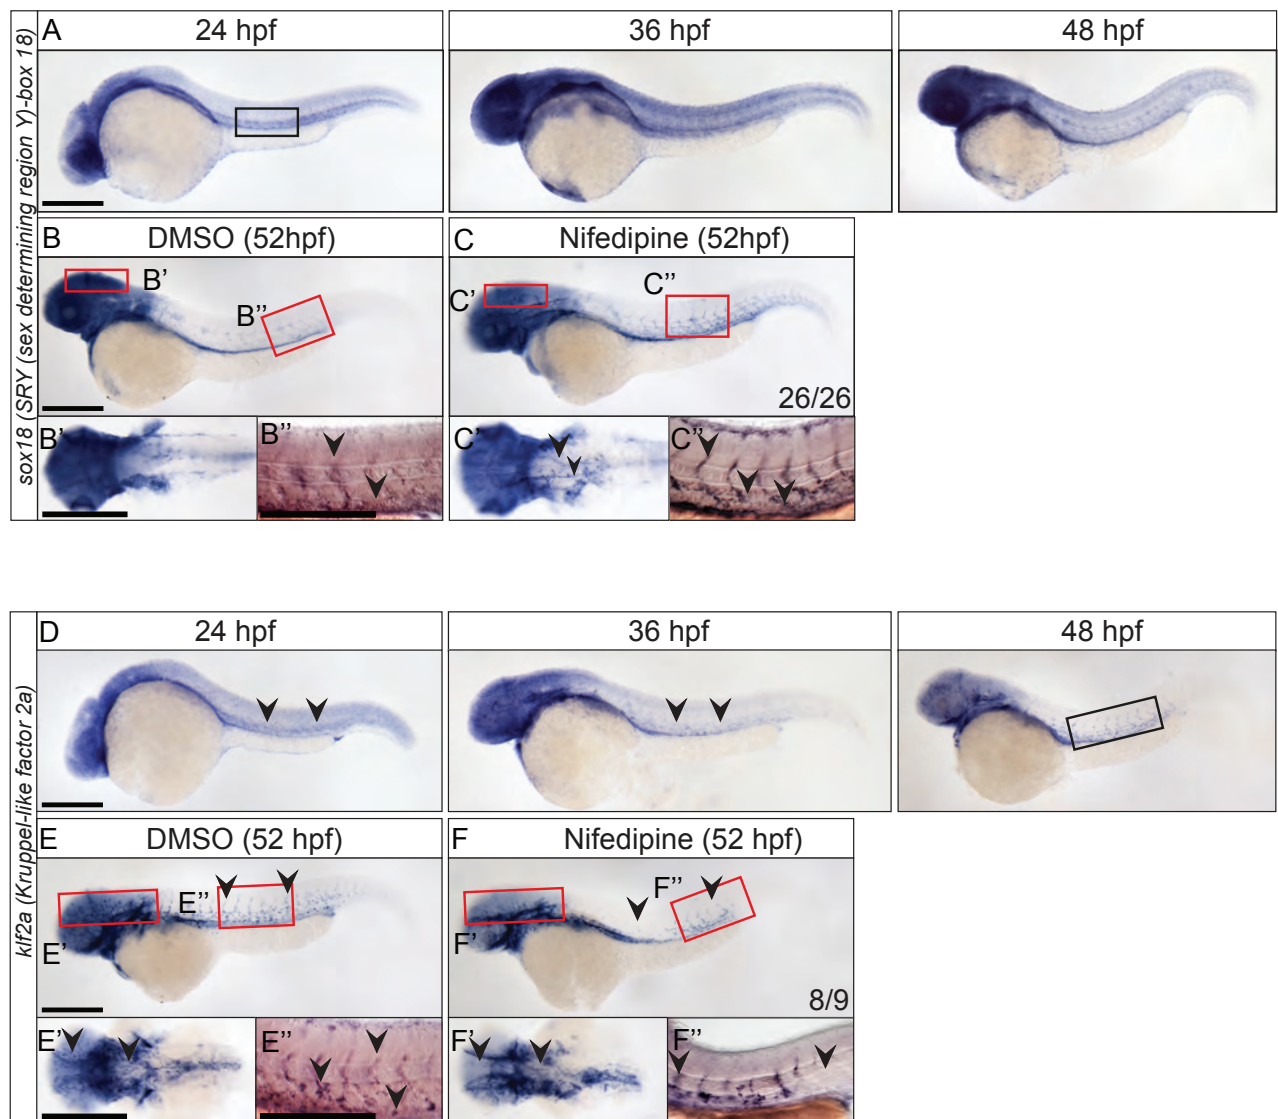

Tsaryk et al., Supplementary Fig. 9

uncropped agarose gel picture related to Fig. 3G

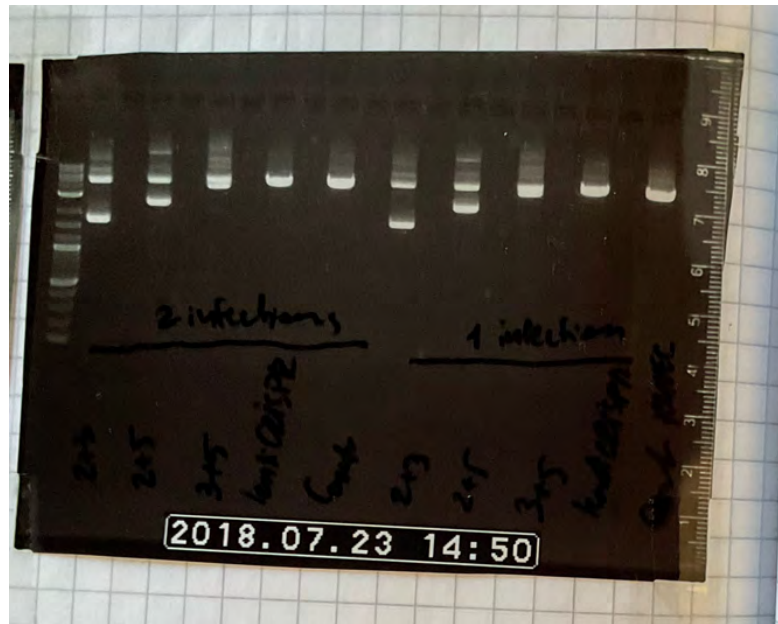

uncropped agarose gel picture related to Supplementary Fig. 5J

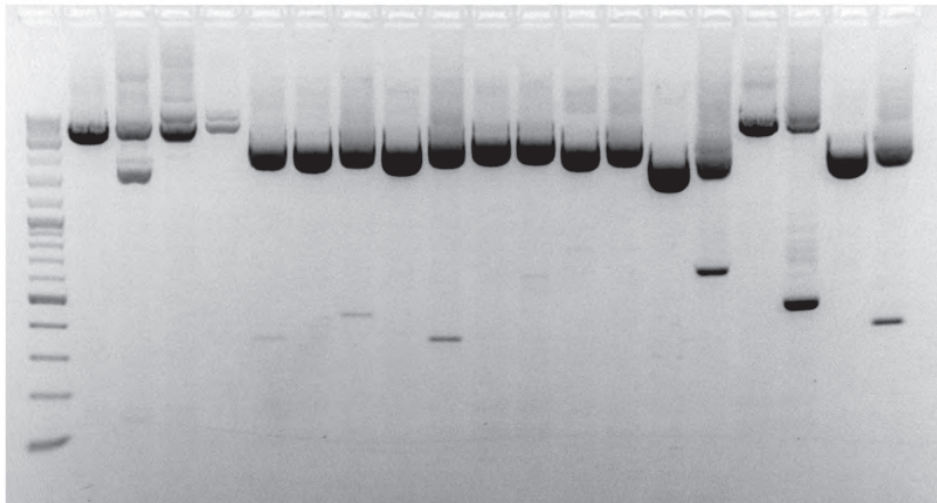

**Supplementary Figure 1. Exposing HUVEC to shear stress for 30 minutes regulates the expression of a distinct set of genes.** **A.** Volcano plot representing differentially expressed (DE) genes ( $\text{FDR} < 0.05$ ) upon HUVEC exposure to shear stress of  $18 \text{ dyn/cm}^2$  for 30 min. Upregulated genes are labelled in red and downregulated genes in blue. **B, C.** Top 20 upregulated genes (**B**) and 17 genes downregulated in HUVEC exposed to shear stress for 30 minutes (**C**).

**Supplementary Figure 2. Overlap of shear stress regulated genes between different studies.** **A, B.** 20 genes most up- (**A**) or downregulated (**B**) upon 6 h exposure to  $18 \text{ dyn/cm}^2$  shear stress (RNA-Seq results). **C.** Correlation of mRNA expression measured by RNA-Seq and qPCR in shear stress exposed HUVEC ( $n = 2$ ). **D.** Over-representation (ORA) analysis of KEGG pathways regulated in the RNA-Seq dataset. **E.** Comparison of DE genes regulated by shear stress in this study with published datasets. RNA-Seq data of Maleszewska et al. (HUVEC exposed to  $20 \text{ dyn/cm}^2$  for 72 h), microarray data of Dekker et al. (HUVEC with adenoviral overexpression of KLF2 for 7 days) and metaanalysis of multiple microarray studies (Maimari et al.) are listed. The amount of up- and down-regulated genes overlapping with our data is presented. The total amount of overlapping genes (irrespective of up- or down-regulation) is additionally shown as percentage compared to the total number of DE genes in our RNA-Seq.

**Supplementary Figure 3. Verification of H3K27ac ChIP-Seq data.** **A.** Pairwise correlation analysis of ChIP-Seq HUVEC samples (cultured under static, “Control”, or shear stress conditions, “Flow”) with HUVEC H3K27ac ChIP-Seq from ENCODE. Pearson coefficient values for each comparison are represented. **B.** Verification of selected gained, lost and common H3K27ac ChIP-Seq peaks with ChIP-qPCR. Additionally, a region with no H3K27ac ChIP-Seq enrichment was tested as negative control. The data are presented as % of input (mean + sem,  $n = 3$ , \*  $p < 0.05$  compared to corresponding control, two-tailed paired t-test).

**Supplementary Figure 4. Comparison of ATAC-Seq and H3K27ac ChIP-Seq data sets and DNA motif analysis.** **A.** Annotation of all gained, lost and common ATAC-Seq peaks to the defined regions of the genome. **B.** Overlap of gained and lost ATAC-Seq peaks with gained, lost and common H3K27ac ChIP-Seq peaks. Numbers represent percentage of overlap. **C.** Overlap of

gained and lost H3K27ac ChIP-Seq peaks with gained, lost and common ATAC-Seq peaks. Numbers represent percentage of overlap. **D, E.** de novo motif analysis of DNA motifs enriched in gained (**D**) or lost (**E**) ATAC-Seq peaks that overlap with gained and lost H3K27ac ChIP-Seq peaks, respectively. Most enriched motifs (top 10 for gained and all 7 for lost) and corresponding best match are shown. **F, G.** Known motifs enriched in common ATAC-Seq peaks that overlap with gained (**F**) or lost (**G**) H3K27ac-ChIP-Seq peaks. The 10 most enriched motifs are shown.

**Supplementary Figure 5. Functional analysis of flow responsive enhancers.** **A.** Schematic representation of luciferase constructs with a putative enhancer (E) upstream of a minimal promoter (minP) and firefly luciferase gene (Luc). **B.** Luciferase assays with constructs carrying putative enhancers associated with DE genes in HUVEC exposed to 18 dyn/cm<sup>2</sup> for 24 h (data is presented as arbitrary units (a.u.) after normalization to the signal of renilla luciferase; mean  $\pm$  sem, n = 3 - 5, \* p < 0.05, \*\*\*\* p < 0.001, compared to a corresponding static control, two-tailed paired t-test). **C.** Schematic representation of dCas9-p300 construct designed to target putative enhancers to affect gene expression. **D.** Schematic representation of the removal of a putative enhancer (E) with Cas9 and two specific gRNAs (P, promoter; ORF, open reading frame). **E.** Luciferase assay showing luciferase activity of Luc2 and Luc4 constructs, as well as a construct containing both regions (Luc2+4) in HUVEC exposed to 18 dyn/cm<sup>2</sup> for 24 h (the data is presented as arbitrary units (a.u.) after normalization to the signal of renilla luciferase; mean  $\pm$  sem, n = 3, \* p < 0.05, two-tailed paired t-test). **F.** Luciferase activity of Luc4 construct targeted by dCas9-p300 and specific gRNAs in HEK293T17 cells (the data are presented as arbitrary units (a.u.) after normalization to the signal of a renilla luciferase construct; mean  $\pm$  sem, n = 3, \* p < 0.05, \*\* p < 0.01, one-way ANOVA with Dunnet's multiple comparison test). **G.** Normalized ATAC-Seq and H3K27ac ChIP-Seq tracks around the CXCR4 gene. The bars below ATAC-Seq and H3K27ac ChIP-Seq tracks represent corresponding common (grey) or lost (blue) peaks. **H.** CXCR4 mRNA expression in HUVEC exposed to 18 dyn/cm<sup>2</sup> for 6 h (Log2 fold of control, mean  $\pm$  sem, n = 3, \* p < 0.05, two-tailed paired t-test). **I.** Schematic representation of the genomic region upstream of the CXCR4 gene and the pairs of CRISPR/Cas9 constructs designed to remove parts of the region. **J.** Ethidium bromide gel confirming removal of targeted genomic regions. PCR products indicated with an asterisk are shorter than in corresponding controls (Co) and result from successful CRISPR targeting (Cr). Uncropped agarose gel is shown

in Suppl. Fig. 10. **K.** CXCR4 mRNA expression in HUVEC infected with lentiviral constructs encoding Cas9 and gRNAs targeting genomic regions upstream of the CXCR4 gene (data are shown as fold of control, mean  $\pm$  sem, n = 4, \*\* p < 0.01, repeated measures one-way ANOVA with Dunnet's multiple comparison test).

**Supplementary Figure 6. Analysis of flow regulated genes in zebrafish.** **A.** 20 genes most up- (A) or downregulated (B) in zebrafish ECs 4 h after blocking blood flow (48 – 52 hpf, RNA-Seq results). **C.** Correlation of mRNA expression measured by RNA-Seq and qPCR in zebrafish endothelial cells after blocking blood flow (n = 2). **D.** Gene set enrichment analysis (GSEA) of KEGG pathways regulated in the zebrafish RNA-Seq dataset. **E.** Overlap of up- and downregulated, as well as all DE genes in zebrafish with human orthologues regulated by shear stress.

**Supplementary Figure 7. Analysis of genes downregulated by flow.** **A.** Whole mount in situ hybridization for *adma* shows no detectable vascular expression in 24, 36 and 48 hpf zebrafish embryos. **B, C.** Nifedipine treatment from 48 to 52 hpf induces *adma* expression in brain blood vessels (black arrowheads) C, enlarged in C'), while expression is undetectable in DMSO controls (B, enlarged in B'). **D.** Whole mount hybridization for *lyve1a* showing no vascular expression in 24, 36 and 48 hpf embryos. **E, F.** *lyve1a* expression in 52 hpf embryos after 4 h of treatment with DMSO (E) or nifedipine (F). Enlarged images of the head (E' and F') and the trunk (E'' and F'') regions highlighted by red rectangles in E and F. Flow block induces an increased *lyve1a* expression in the common cardinal vein (white arrowheads in E', F and F') and in caudal plexus (blue arrowheads in F and F''). Numbers represent number of embryos with depicted expression pattern out of the total number of embryos tested. Scale bar is 300  $\mu$ m.

**Supplementary Figure 8. Analysis of genes upregulated by flow.** **A.** Whole mount in situ hybridization for *grp182* in 24, 36 and 48 hpf zebrafish embryos. *grp182* is expressed in trunk axial vasculature (black box) and in the primordial midbrain channel (black arrowhead) at 24 hpf and in the dorsal aorta (red arrowheads) and posterior cardinal vein (blue arrowheads) at 36 and 48 hpf. **B, C.** *grp182* expression in 52 hpf embryos after 4 h treatment with DMSO (B) or nifedipine (C). Enlarged images of the head (B' and C') and the trunk (B'' and C'') regions

highlighted by red rectangles in **B** and **C**. Flow block decreases *grp182* expression in lateral dorsal aorta (red arrowheads) and posterior cardinal vein (blue arrowheads). **D**. Whole mount in situ hybridization for *idl* in 24, 36 and 48 hpf zebrafish embryos. Expression of *idl* is detected in the neural tube (blue arrowheads), hypochord (red arrowheads), axial vasculature (black box) and intersegmental blood vessels (black arrowheads). **E, F**. *idl* expression in 52 hpf embryos after 4 h treatment with DMSO (**E**) or nifedipine (**F**). Enlarged images of the head (**E'** and **F'**) and the trunk (**E''** and **F''**) regions highlighted by red and black rectangles in **E** and **F**. Flow block reduces *idl* expression in intersegmental vessels (black arrowheads) and in axial vessels (white brackets), while expression in the neural tube (blue arrowheads) and hypochord (red arrowheads) remains unaffected. Numbers represent number of embryos with depicted expression pattern out of the total number of embryos tested. Scale bar is 300  $\mu$ m.

**Supplementary Figure 9. Regulation of *sox18* and *klf2a* expression by flow in zebrafish embryos.**

**A**. Whole mount in situ hybridization for *sox18* in 24, 36 and 48 hpf zebrafish embryos. The black box highlights vascular expression in the trunk at 24 hpf, which is reduced at later stages. **B, C**. *sox18* expression in 52 hpf embryos after 4 h treatment with DMSO (**B**) or nifedipine (**C**). Enlarged images of the head (**B'** and **C'**) and the trunk (**B''** and **C''**) regions highlighted by red rectangles in **B** and **C**. Black arrowheads indicate vascular expression, which is increased after inhibition of blood flow. **D**. Whole mount in situ hybridization for *klf2a* in 24, 36 and 48 hpf zebrafish embryos. Black arrowheads indicate expression in trunk axial vessels at 24 and 36 hpf and the black box highlights increased expression in axial vessels, as well as in intersegmental vessels at 48 hpf. **E, F**. *klf2a* expression in 52 hpf embryos after 4 h treatment with DMSO (**E**) or nifedipine (**F**). Enlarged images of the head (**E'** and **F'**) and the trunk (**E''** and **F''**) regions highlighted by red boxes in **E** and **F**. Black arrowheads indicate vascular expression, which is decreased after flow block in the brain and in the trunk. Numbers represent number of embryos with depicted expression pattern out of the total number of embryos analyzed. Scale bar is 300  $\mu$ m.

**Supplementary Figure 10. Uncropped agarose gels for Fig. 3G and Suppl. Fig. 5J.**
